# Supplementary material
Source: PubMed Central journal article supplement (PMC2807335)

## SUPPLEMENTARY FIGURES

**Fig.1. Schematic depiction illustrating the various mutants used to probe the specificity of Plks mediated phosphorylation of synucleins.** Table summarising the *in vitro* phosphorylation of human a-, b- and g-syn, a-syn variants, as well as mouse WT a-syn after 24 hours of phosphorylation. Key: +, > 10% phosphorylation, ++, > 20% phosphorylation, +++, > 50% phosphorylation, +++++, > 75% phosphorylation, +++++, 100% phosphorylation.

**Fig. 2. *In vitro* phosphorylation of a-syn harbouring mutations in the NAC region by PLK1-4.** MALDI-TOF analysis of the phosphorylated human E83A, S87A and S87E a-syn by PLK1-4.

**Fig. 3. *In vitro* phosphorylation of  $\alpha$ -syn harbouring mutations in the C-terminus by PLK1-4.** (A) MALDI-TOF analysis of the phosphorylated S129A  $\alpha$ -syn by PLK2. (B) MALDI-TOF analysis of the phosphorylated mouse WT and human E126A  $\alpha$ -syn by PLK1-4.

**Supplementary Figure 1**

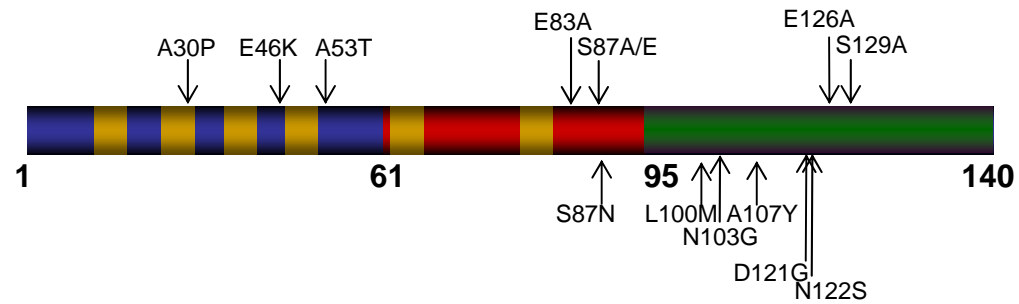

|                                             | <b>PLK1</b> | <b>PLK2</b> | <b>PLK3</b> | <b>PLK4</b> |
|---------------------------------------------|-------------|-------------|-------------|-------------|
| <b>wt <math>\alpha</math>-syn</b>           | ++++        | +++++       | +++++       | -           |
| <b>wt <math>\beta</math>-syn</b>            | +++++       | +           | +++++       | -           |
| <b>wt <math>\gamma</math>-syn</b>           | -           | -           | -           | -           |
| <b>A30P <math>\alpha</math>-syn</b>         | ++++        | +++++       | +++++       | -           |
| <b>A53T <math>\alpha</math>-syn</b>         | ++++        | +++++       | +++++       | -           |
| <b>E46K <math>\alpha</math>-syn</b>         | ++++        | +++++       | +++++       | -           |
| <b>S87A <math>\alpha</math>-syn</b>         | -           | +++         | +++++       | -           |
| <b>S87E <math>\alpha</math>-syn</b>         | -           | ++++        | +++++       | -           |
| <b>S129A <math>\alpha</math>-syn</b>        | -           | -           | -           | -           |
| <b>E83A <math>\alpha</math>-syn</b>         | +++         | +++++       | +++++       | -           |
| <b>E126A <math>\alpha</math>-syn</b>        | +           | +++         | +           | -           |
| <b>wt <math>\alpha</math>-syn (103-140)</b> | -           | +           | ++          | -           |
| <b>Mouse wt <math>\alpha</math>-syn</b>     | ++          | +++++       | +++++       | -           |
| <b><math>\alpha</math>-syn fibrils</b>      | +           | +++         | +++++       | -           |

**Supplementary Figure 2**

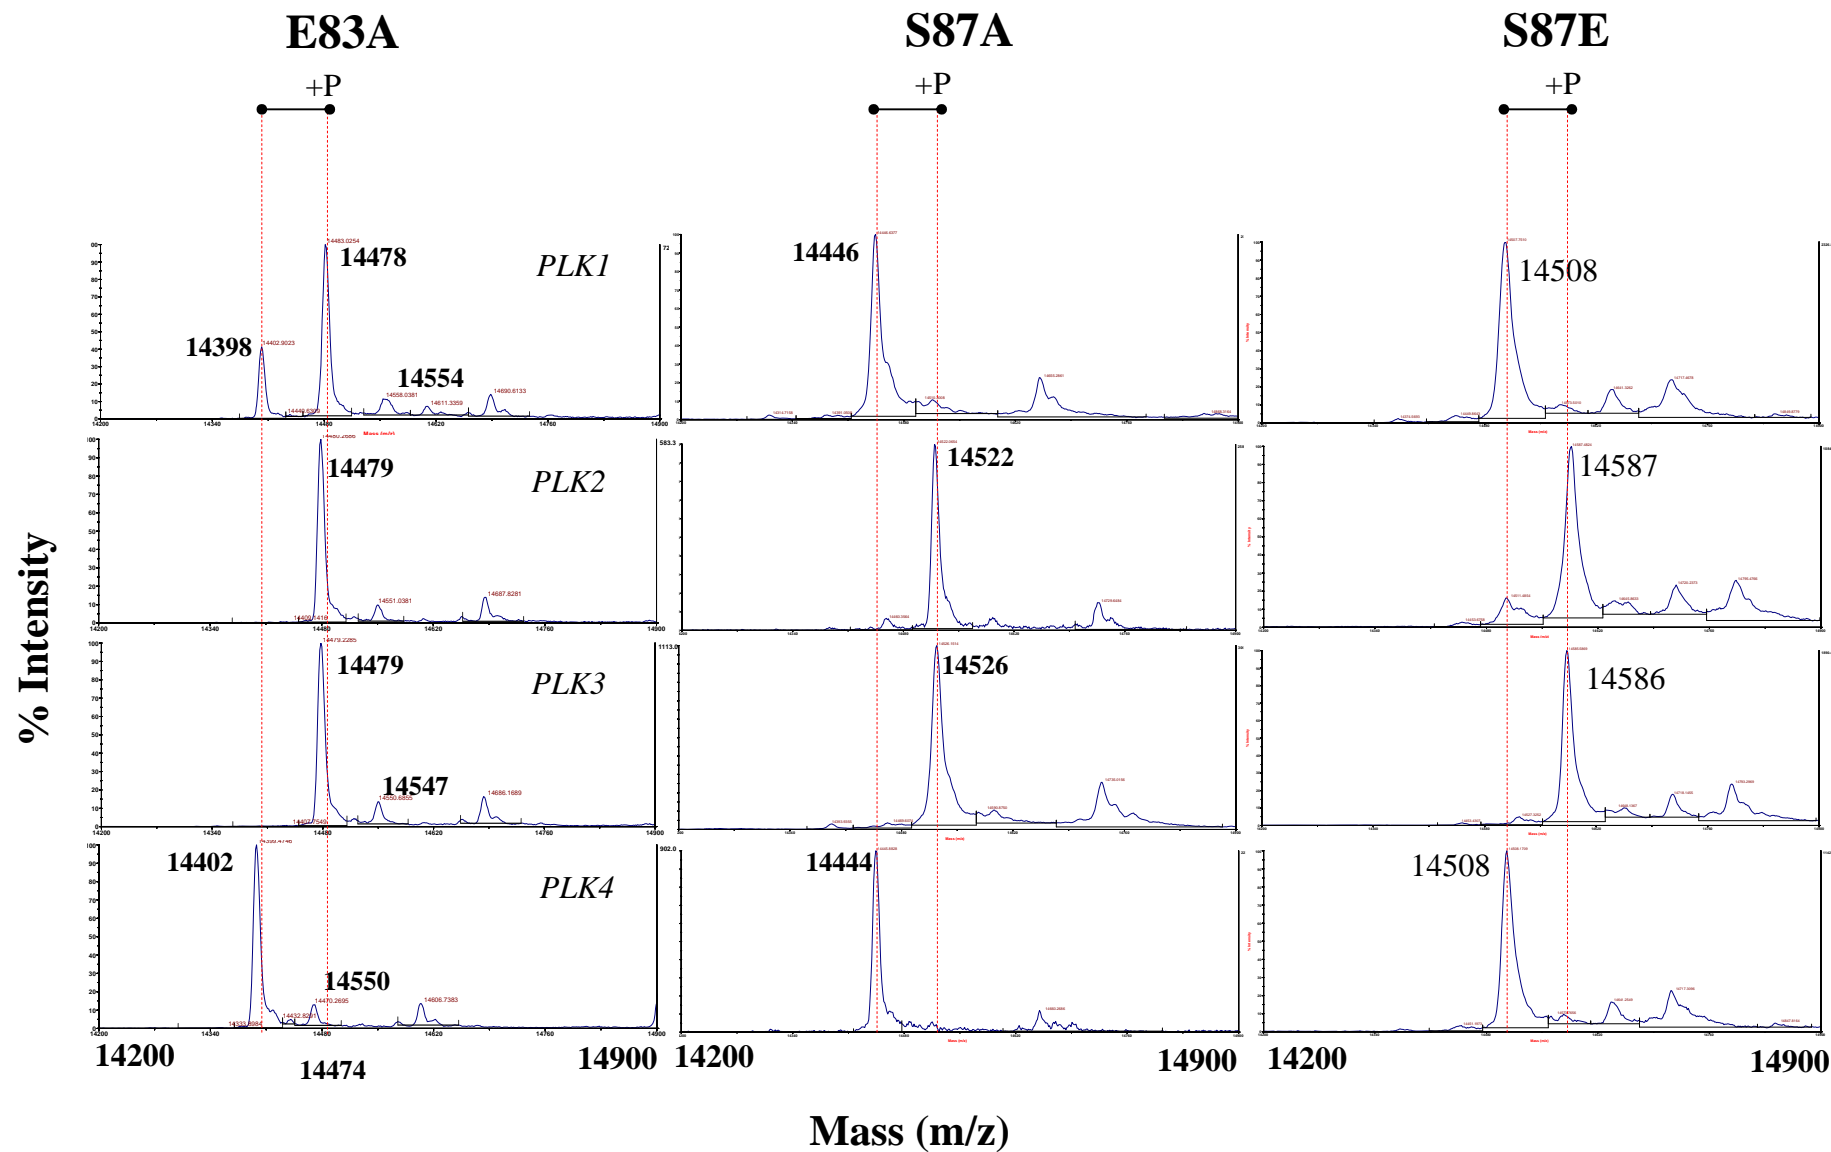

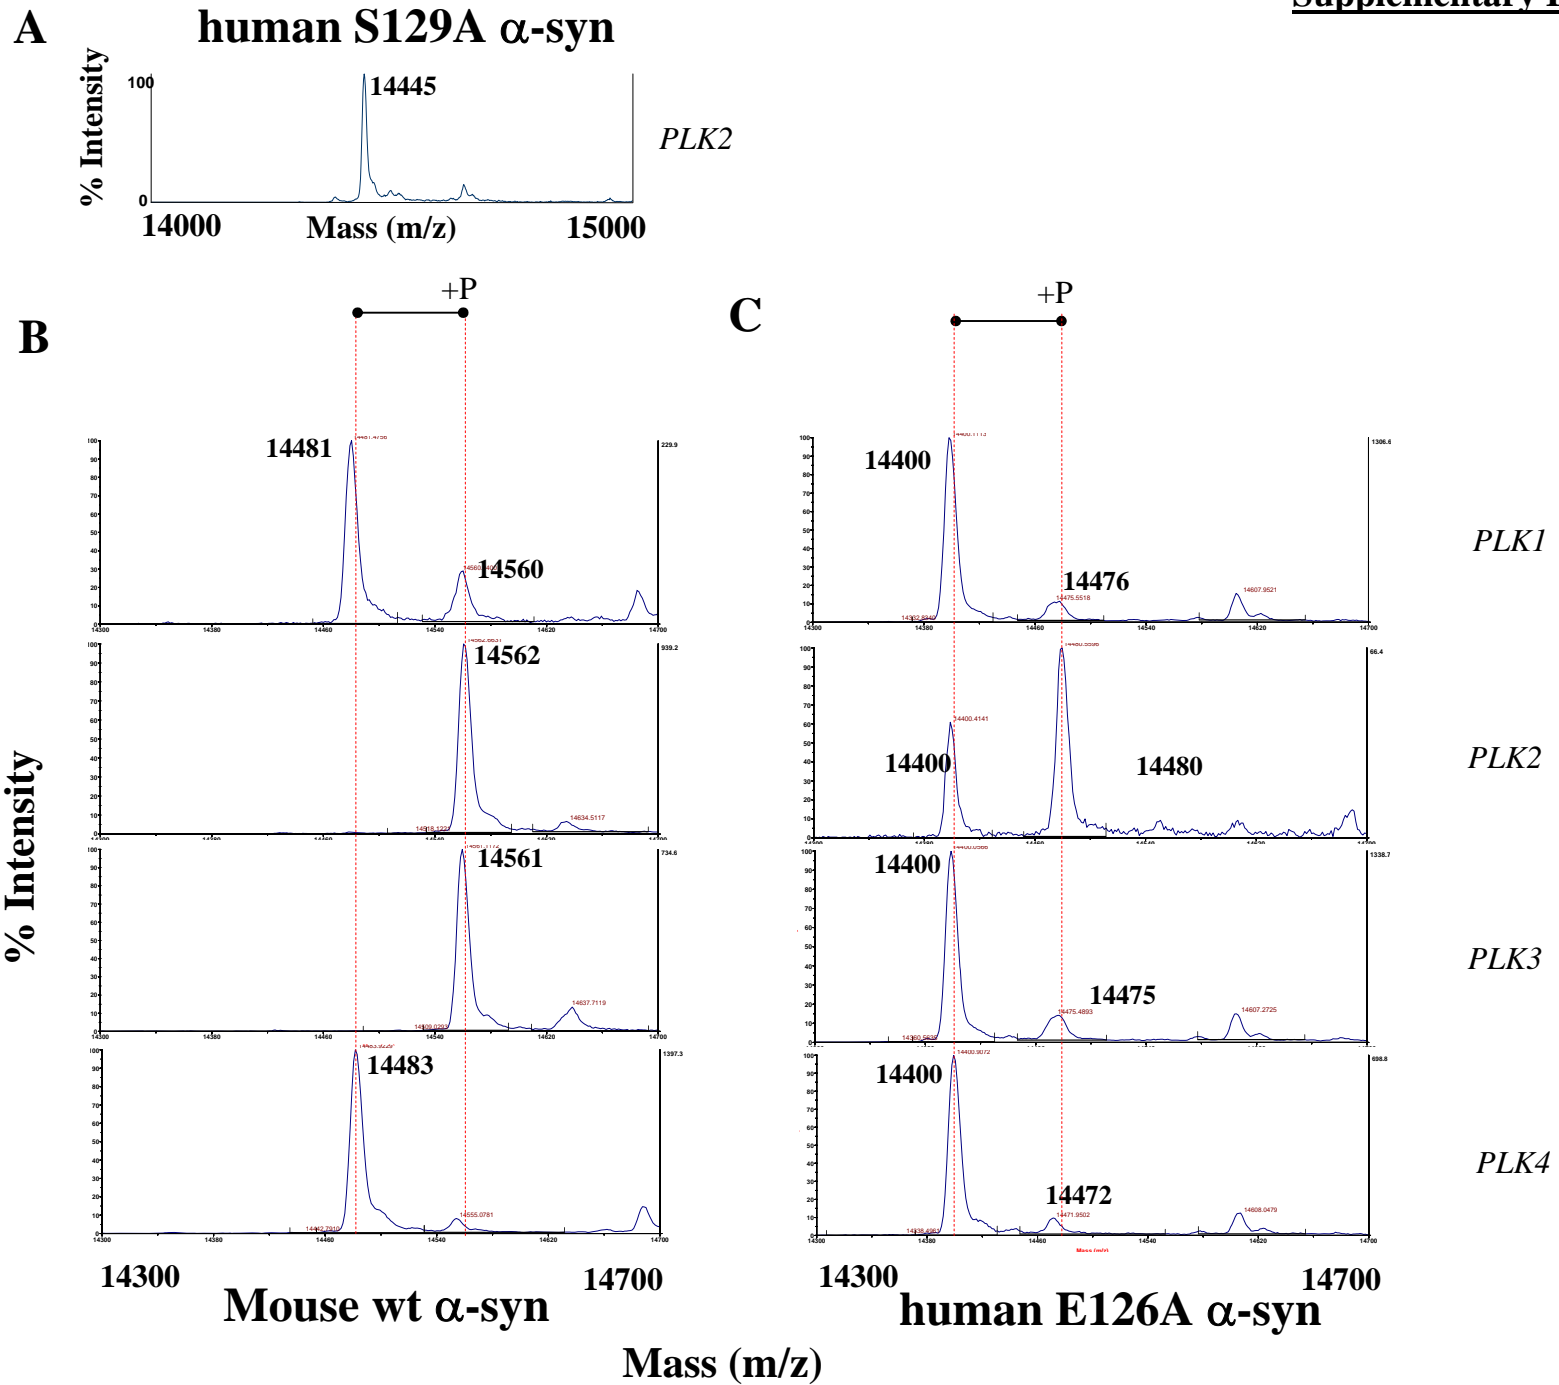

Supplement: supp_M109.081950_jbc.M109.081950-1.pdf [file supp_M109.081950_jbc.M109.081950-1.pdf]
